# Supplementary material
Source: HighWire-hosted journal article supplement (https://care.diabetesjournals.org/content/suppl/2005/01/03/28.1.154)
Supplement: dc0943OnlineAppendixB.pdf [file dc0943OnlineAppendixB.pdf]

Review: Alpha-glucosidase inhibitors for type 2 diabetes mellitus  
 Comparison: 01 Acarbose versus placebo  
 Outcome: 03 Change in post-load blood glucose (mmol/l)

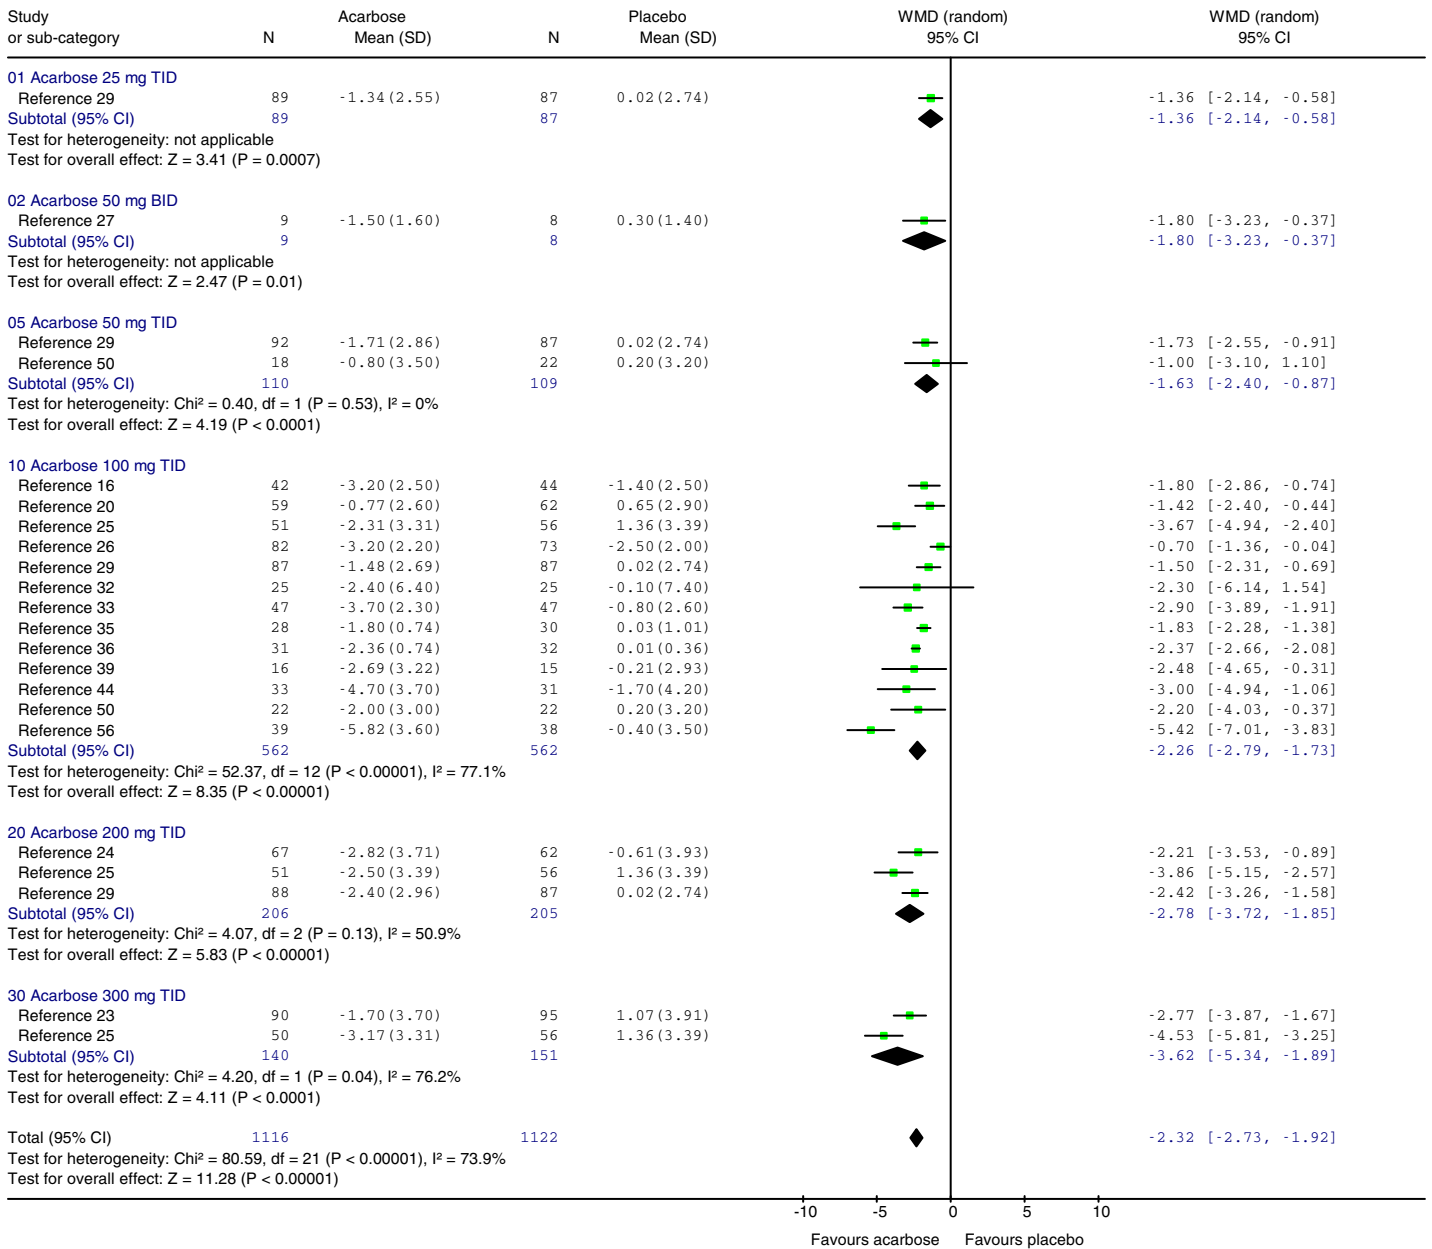

Appendix B
