# Supplementary material
Source: HighWire-hosted journal article supplement (https://care.diabetesjournals.org/content/suppl/2005/01/03/28.1.154)
Supplement: dc0943OnlineAppendixC.pdf [file dc0943OnlineAppendixC.pdf]

Review: Alpha-glucosidase inhibitors for type 2 diabetes mellitus  
 Comparison: 02 Acarbose versus sulphonylurea (SU)  
 Outcome: 01 Change in glycated haemoglobin (%)

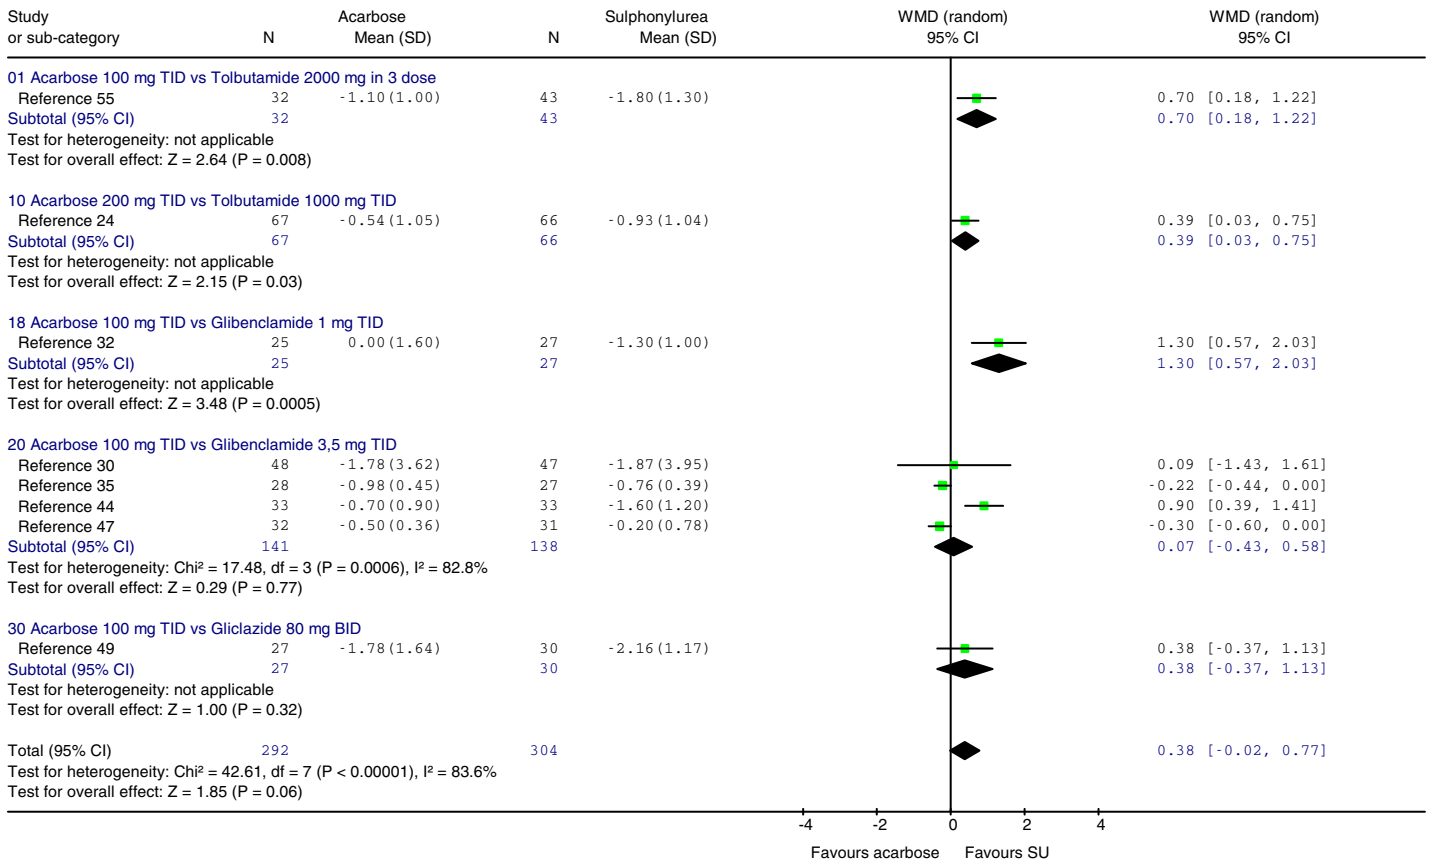

Appendix C
